# Supplementary material
Source: publisher site journal article supplement (https://www.spandidos-publications.com/7777/downloadSupplementary)

Figure S1. Gene Set Enrichment Analysis. Top eight pathways associated with (A) *CDKN2A*, (B) *CFHR3*, (C) *CYP2C9*, (D) *HMGB2*, (E) *IGLC2* and (F) *JPT1*. *CDKN2A*, cyclin-dependent kinase inhibitor 2A; *CFHR3*, complement factor H-related 3; *CYP2C9*, cytochrome P450 family 2 subfamily C member 9; *HMGB2*, high mobility group box 2; *IGLC2*, immunoglobulin  $\lambda$  constant 2; *JPT1*, Jupiter microtubule-associated homolog 1.

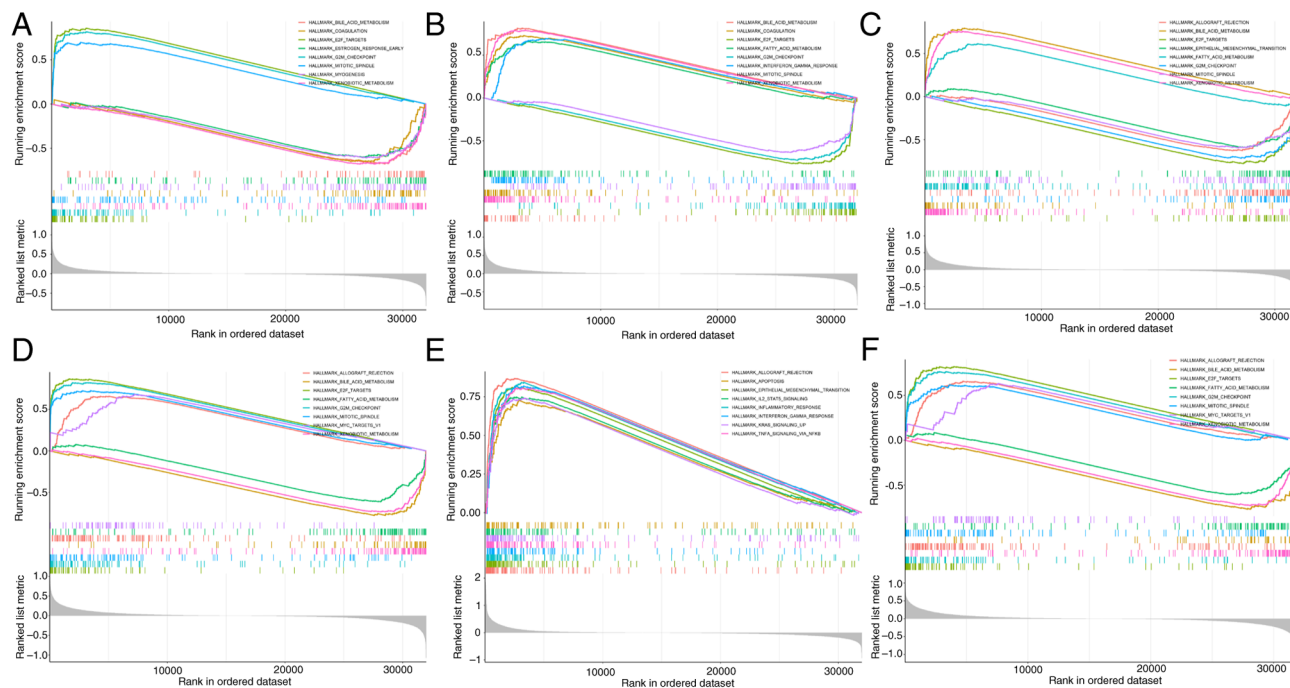

Supplement: Supplementary file 1 [file downloadSupplementary]
